# Supplementary material for: Improving the reporting of metagenomic virome-scale data
Source: PubMed Central journal article supplement — Commun Biol. 2024 Dec 20;7:1687. doi: 10.1038/s42003-024-07212-3 (PMC11662069; doi:10.1038/s42003-024-07212-3), 2024-12-20
Supplement: 42003_2024_7212_MOESM1_ESM.pdf [file 42003_2024_7212_MOESM1_ESM.pdf]

| Category                        | Metadata                                        | Description                                                                                                                                                                                                                                                                                                                                                                    | Details                                                                                                                                                                                                                                                                                                                                                      | Specificity to virome            |
|---------------------------------|-------------------------------------------------|--------------------------------------------------------------------------------------------------------------------------------------------------------------------------------------------------------------------------------------------------------------------------------------------------------------------------------------------------------------------------------|--------------------------------------------------------------------------------------------------------------------------------------------------------------------------------------------------------------------------------------------------------------------------------------------------------------------------------------------------------------|----------------------------------|
| <b>General sample metadata</b>  | Sample name                                     | Name of the sample                                                                                                                                                                                                                                                                                                                                                             |                                                                                                                                                                                                                                                                                                                                                              | Identical MIMAG / MISAG/ UViG    |
|                                 | Sample type                                     | Sample type, including by not limited to: tissues, blood, swabs, faeces, filters, feathers, skin, etc.                                                                                                                                                                                                                                                                         |                                                                                                                                                                                                                                                                                                                                                              |                                  |
|                                 | sample collection time                          | Collection date                                                                                                                                                                                                                                                                                                                                                                | dd/mm/yyyy                                                                                                                                                                                                                                                                                                                                                   | Identical MIMAG / MISAG/ UViG    |
|                                 | geographic location (latitude and longitude)    | The geographical origin of the sample as defined by latitude and longitude. The values should be reported in decimal degrees and in WGS84 system                                                                                                                                                                                                                               | decimal degrees                                                                                                                                                                                                                                                                                                                                              | Identical MIMAG / MISAG/ UViG    |
|                                 | geographic location (depth)                     | Follow the definitions of depth in the environmental packages                                                                                                                                                                                                                                                                                                                  |                                                                                                                                                                                                                                                                                                                                                              | Identical MIMAG / MISAG/ UViG    |
|                                 | geographic location (altitude/elevation)        | Follow the definitions of either altitude or elevation in the environmental packages                                                                                                                                                                                                                                                                                           |                                                                                                                                                                                                                                                                                                                                                              | Identical MIMAG / MISAG/ UViG    |
|                                 | geographic location (country and/or sea,region) | The geographical origin of the sample as defined by the country or sea name followed by specific region name. Name of country/sea from the INSDC country list ( <a href="http://insdc.org/country.html">http://insdc.org/country.html</a> ), or the GAZ ontology (v 1.512) ( <a href="http://purl.bioontology.org/ontology/GAZ">http://purl.bioontology.org/ontology/GAZ</a> ) | country or sea name (INSDC or GAZ);region(GAZ);specific location name                                                                                                                                                                                                                                                                                        | Identical MIMAG / MISAG/ UViG    |
|                                 | host biological information                     | Host information including age, sex, health/disease status, season, and phenotype                                                                                                                                                                                                                                                                                              |                                                                                                                                                                                                                                                                                                                                                              | New                              |
|                                 | Sample storage                                  | Type and condition of sample stored and shipping (i.e. media, or RNAlater)                                                                                                                                                                                                                                                                                                     |                                                                                                                                                                                                                                                                                                                                                              | New                              |
| <b>Sample preparation</b>       | Pooling strategy                                | Type of protocol including number of samples per pool, how samples were selected per pool (e.g. same species, location, date), how individual sample concentrations were taken into consideration                                                                                                                                                                              |                                                                                                                                                                                                                                                                                                                                                              | Comparable to UViGs and improved |
|                                 | Extraction methods                              | Name of kit and distributor and any modifications from manufacturers instructions                                                                                                                                                                                                                                                                                              | Kit name, distributor, country                                                                                                                                                                                                                                                                                                                               | Comparable to UViGs and improved |
|                                 | Enrichment/depletion/amplification method       | Outline of protocol, and if kits use, the name of kit and distributor and any modifications from manufacturers instructions                                                                                                                                                                                                                                                    | Kit name, distributor, country                                                                                                                                                                                                                                                                                                                               | Comparable to UViGs and improved |
| <b>Sequencing methodology</b>   | Negative/Positive controls                      | How controls were constructed                                                                                                                                                                                                                                                                                                                                                  |                                                                                                                                                                                                                                                                                                                                                              | New                              |
|                                 | sequencing approach                             | Approaching to sequencing to contextualise results                                                                                                                                                                                                                                                                                                                             | Specify if: metagenome (not viral targeted)   viral fraction metagenome (virome)   sequence-targeted metagenome   metatranscriptome (not viral targeted)   viral fraction RNA metagenome (RNA virome)   sequence-targeted RNA metagenome   microbial single amplified genome (SAG)   viral single amplified genome (vSAG)   isolate microbial genome   other | Comparable to UViGs and improved |
|                                 | sequcing methods                                | Sequencing machine, and flowcell, read length, paired-end or single-end and number of reads per library                                                                                                                                                                                                                                                                        |                                                                                                                                                                                                                                                                                                                                                              | Comparable to UViGs and improved |
| <b>Bioinformatic approaches</b> | quality control & trimming                      | Software used for reads quality controls and trimming                                                                                                                                                                                                                                                                                                                          | software name, version number, and specific parameters used                                                                                                                                                                                                                                                                                                  | Comparable to UViGs and improved |
|                                 | assembly software                               | Tool(s) used for assembly and/or binning, version number and parameters                                                                                                                                                                                                                                                                                                        | software name, version number, and specific parameters used                                                                                                                                                                                                                                                                                                  | Identical MIMAG / MISAG /UViGs   |
|                                 | Read mapping                                    | Tool (s) used for remapping reads back to contigs                                                                                                                                                                                                                                                                                                                              | software name, version number, and specific parameters used                                                                                                                                                                                                                                                                                                  |                                  |
|                                 | Genome abundance and coverage                   | Tool(s) of reads mapping tools and the number of reads mapped back to genome                                                                                                                                                                                                                                                                                                   | software name, version number, and specific parameters used                                                                                                                                                                                                                                                                                                  | Comparable to UViGs and improved |
|                                 | Contig statistics                               | Number of contigs, maximum/minimum/average contig length                                                                                                                                                                                                                                                                                                                       |                                                                                                                                                                                                                                                                                                                                                              | New                              |
|                                 | Viral identification software                   | Tool(s) used for the identification of viral genome, software or protocol name including version number, parameters, and cutoffs used                                                                                                                                                                                                                                          | software name, version number, and specific parameters used                                                                                                                                                                                                                                                                                                  | Identical MIMAG / MISAG /UViGs   |
|                                 | Relationship to most closely related viruses    | Top hit name, the similarity and its accession number,the percent nucleotide or protein similarity thresholds                                                                                                                                                                                                                                                                  |                                                                                                                                                                                                                                                                                                                                                              | Comparable to UViGs and improved |
|                                 | <b>Checks and balances</b>                      | Index hopping                                                                                                                                                                                                                                                                                                                                                                  | Check the balance of sequencing and reads percentage                                                                                                                                                                                                                                                                                                         |                                  |
| Reagent contamination           |                                                 | Checking with existing known contaminants, inclusion of no template control libraries to identify putative reagent contamination,                                                                                                                                                                                                                                              | reference of contaminant list used. software name, version number, and specific parameters used                                                                                                                                                                                                                                                              | New                              |

|                          |                                                   |                                                                                                                                        |                                                                                                 |                                  |
|--------------------------|---------------------------------------------------|----------------------------------------------------------------------------------------------------------------------------------------|-------------------------------------------------------------------------------------------------|----------------------------------|
|                          | Mis-assembly                                      | Mapping back reads to virus contigs to check if there is assembly error                                                                | software name, version number, and specific parameters used                                     | Comparable to UViGs and improved |
| <b>Annotation</b>        | ORFs found                                        | Presentation of all putative ORFs in each viral genome                                                                                 | Presentation of ORFs, software name, version number, and specific parameters used               | Identical to UViGs               |
|                          | Domains, motifs, mature peptides, IRES sites, etc | Presentation of key domains/motifs/etc for each genome to ensure correct orientation and order in alignment with ICTV                  | software name, version number, and specific parameters used                                     | Comparable to UViGs and improved |
|                          | Identification of EVEs                            | identifying truncated and/or non-functional proteins, investigating the genomic context from DNA sequencing                            | approach described, as well as software name, version number, and specific parameters used      | New                              |
| <b>Phylogeny</b>         | Phylogenetic analysis                             | phylogenetic estimate model, software, nodal support, and parameter                                                                    | software name, version number, and specific parameters used                                     | New                              |
|                          | Code availability                                 | Raw data (such as alignments or nwk files) available                                                                                   | Repository and doi or similar                                                                   | New                              |
| <b>Virus Description</b> | Virus name                                        | Follow ICTV demarcation and novel virus naming system                                                                                  | Description of naming approach used                                                             | Comparable to UViGs and improved |
|                          | Virus genome completeness                         | Genome is complete or partial                                                                                                          | Partial or Complete                                                                             | Identical to UViGs               |
|                          | Virus genome length                               | Virus genome length                                                                                                                    | base pair of nt, aa                                                                             | Identical to UViGs               |
|                          | Predicted genome type                             | Type of genome predicted for the viral genome                                                                                          | [ DNA   dsDNA   ssDNA   RNA   dsRNA   ssRNA   ssRNA (+)   ssRNA (-)   mixed   uncharacterized ] | Identical to UViGs               |
|                          | Predicted genome structure                        | Expected structure of the viral genome                                                                                                 | [ segmented   non-segmented   undetermined ]                                                    | Identical to UViGs               |
| <b>Host association</b>  | Broad host classification                         | Clarity of whether virus is host infecting, or likely "host associated" (e.g. a virus of diet or microbiome)                           |                                                                                                 | New                              |
|                          | Deposit reads                                     | Deposit reads into NCBI Sequence Read Archive (or similar) with associated metadata                                                    | Repository and accession numbers                                                                | Comparable to UViGs and improved |
|                          | Deposit viral genomes                             | Deposit fully annotated (including ORFs) viral genome into publically accessible database (e.g. GenBank, ENA) with associated metadata | Repository and accession numbers                                                                | Comparable to UViGs and improved |
| <b>Data Sharing</b>      | Code availability                                 | Novel or updated pipelines/code should be deposited in publically available repository (e.g. Github, FigShare).                        | Repository and doi or similar                                                                   | New                              |
